# Supplementary material for: Cancer cell‐derived novel periostin isoform promotes invasion in head and neck squamous cell carcinoma
Source: PubMed Central journal article supplement (PMC10134278; doi:10.1002/cam4.5601), 2023-01-23
Supplement: CAM4-12-8510-s001.pdf [file CAM4-12-8510-s001.pdf]

## **Supplementary information**

Cancer cell-derived novel periostin isoform promotes invasion in head and neck squamous cell carcinoma

Shao Wenhua, Takaaki Tsunematsu, Masaaki Umeda, Natsumi Fujiwara, Yasuhiro Mouri, Rieko Arakaki, Naozumi Ishimaru, Yasusei Kudo

## Supplementary Figure S1

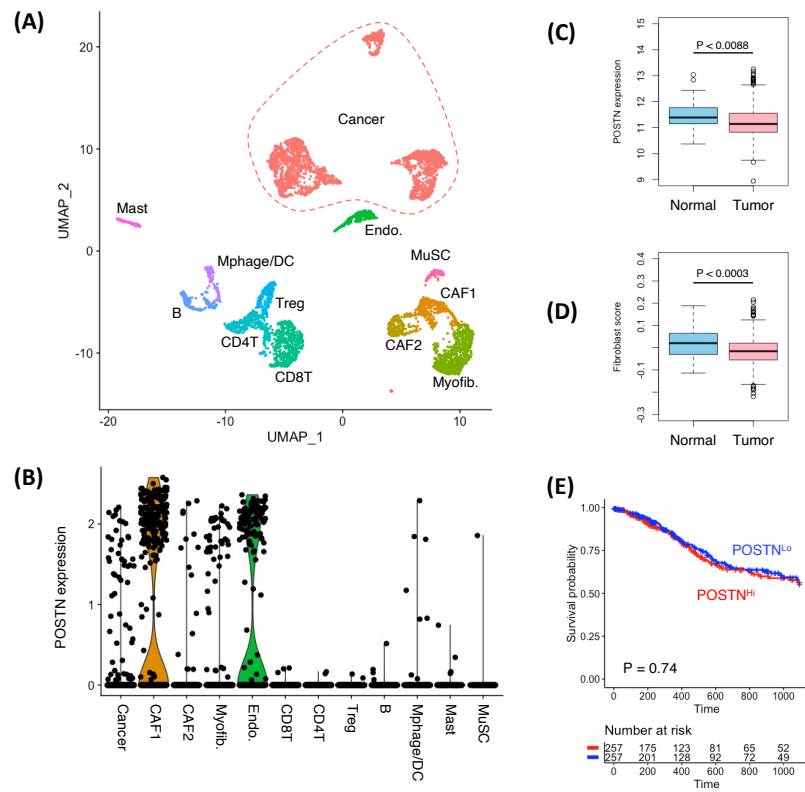

### Supplementary Figure S1. *POSTN* expression in the heterogeneity of malignant and non-malignant cells within the HNSCC tissues.

The processed scRNAseq data obtained from the Gene Expression Omnibus (GEO) database, (accession number: GSE103322), was used<sup>31</sup>. (A) UMAP clustering of all cells including malignant and non-malignant cells was shown. (B) Violin plot depicts distributions of the *POSTN* expression in malignant and non-malignant cells. (C) The comparison of *POSTN* expression between normal and tumor tissues in TCGA-HNSC. (D) The comparison of fibroblast abundance between normal and tumor tissues in TCGA-HNSC. (E) The three-year overall survival in TCGA-HNSC. HNSC patients were divided by the median *POSTN* expression.

## Supplementary Figure S2

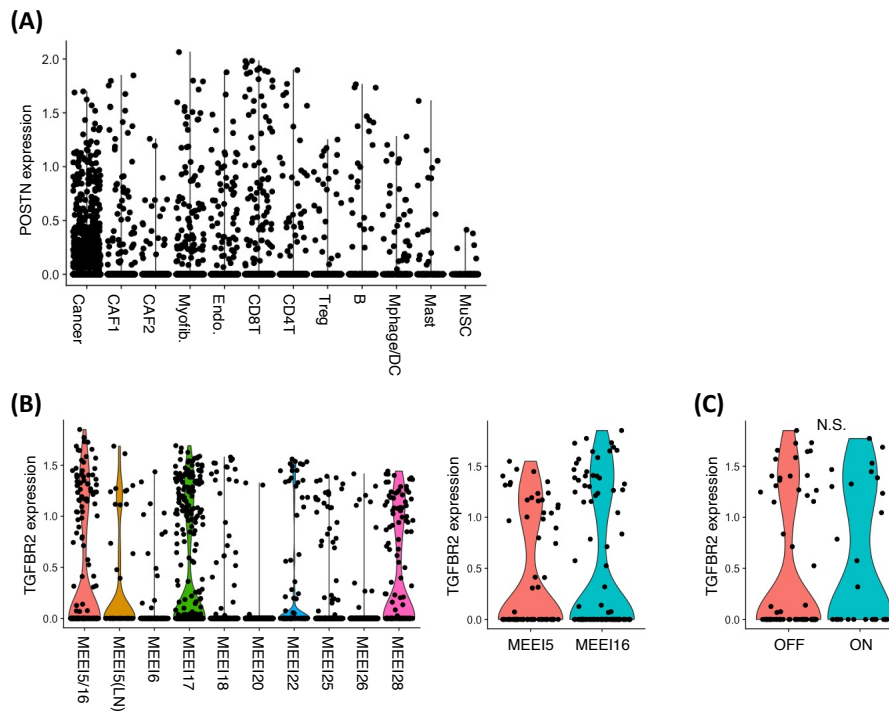

### Supplementary Figure S2. TGFBR2 expression in the heterogeneity of non-malignant cells and cancer cells within the HNSCC tissues.

The processed sc-RNAseq data obtained from the Gene Expression Omnibus (GEO) database, (accession number: GSE103322), was used<sup>31</sup>. (A) Violin plot depicts distributions of the TGFBR2 expression in all cell types. (B) Violin plot depicts distributions of the TGFBR2 expression in malignant cells. (C) Violin plot depicts distributions of the *TGFBR2* expression in *POSTN* expressing and non-expressing malignant cells in MEEI16 tumor.
